# Supplementary figures and images for: Transcriptional modulation of pattern recognition receptors in chronic colitis in mice is accompanied with Th1 and Th17 response
Source: PubMed Central journal article supplement — Biochem Biophys Rep. 2017 Aug 22;12:29–39. doi: 10.1016/j.bbrep.2017.08.009 (PMC5613238; doi:10.1016/j.bbrep.2017.08.009), 2017-08-22

Figure S1

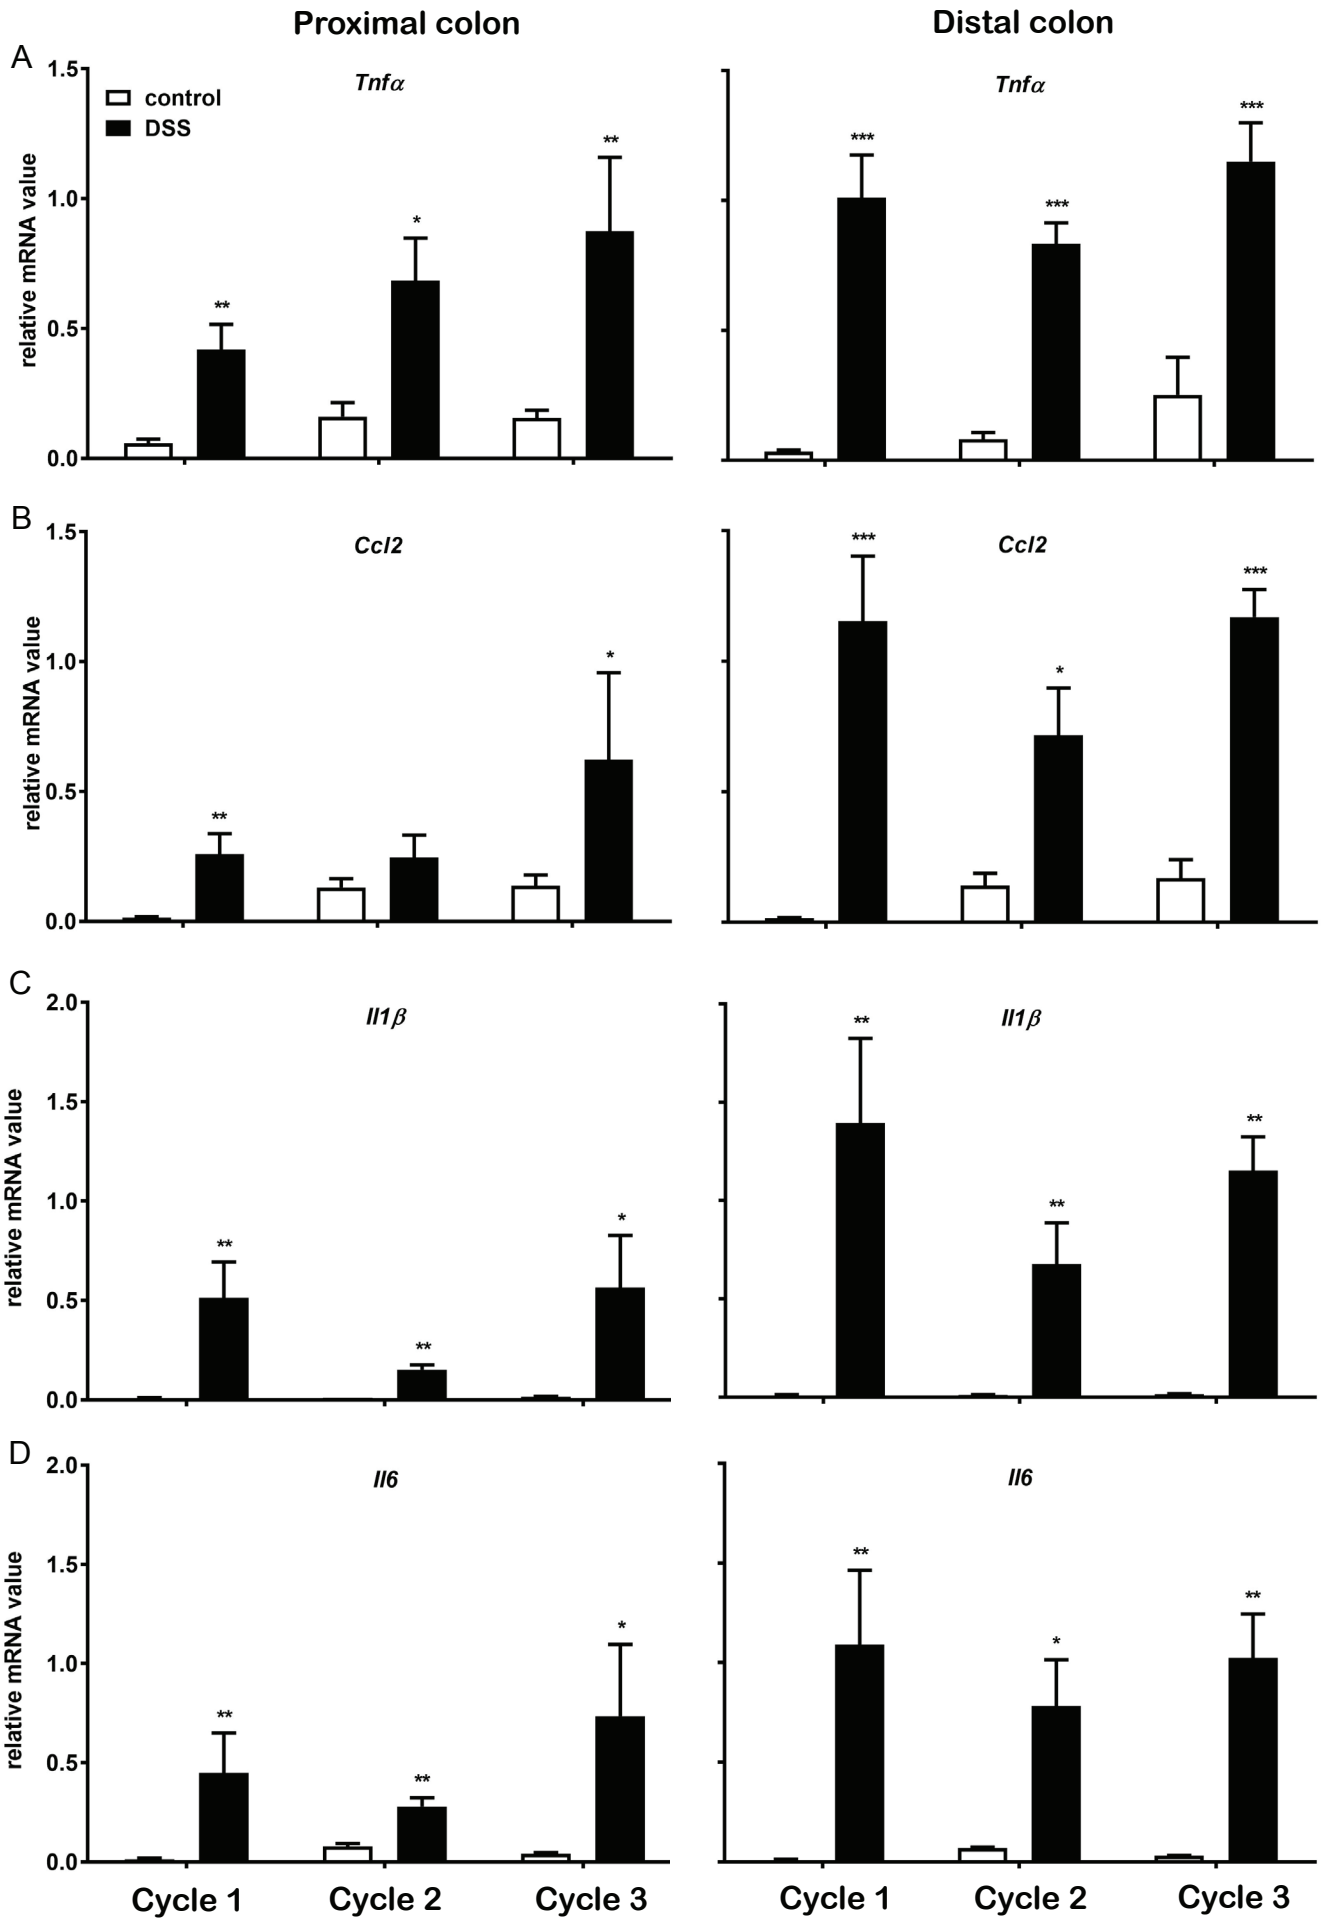

Supplement: mmc1.pdf [file mmc1.pdf]

Figure S2

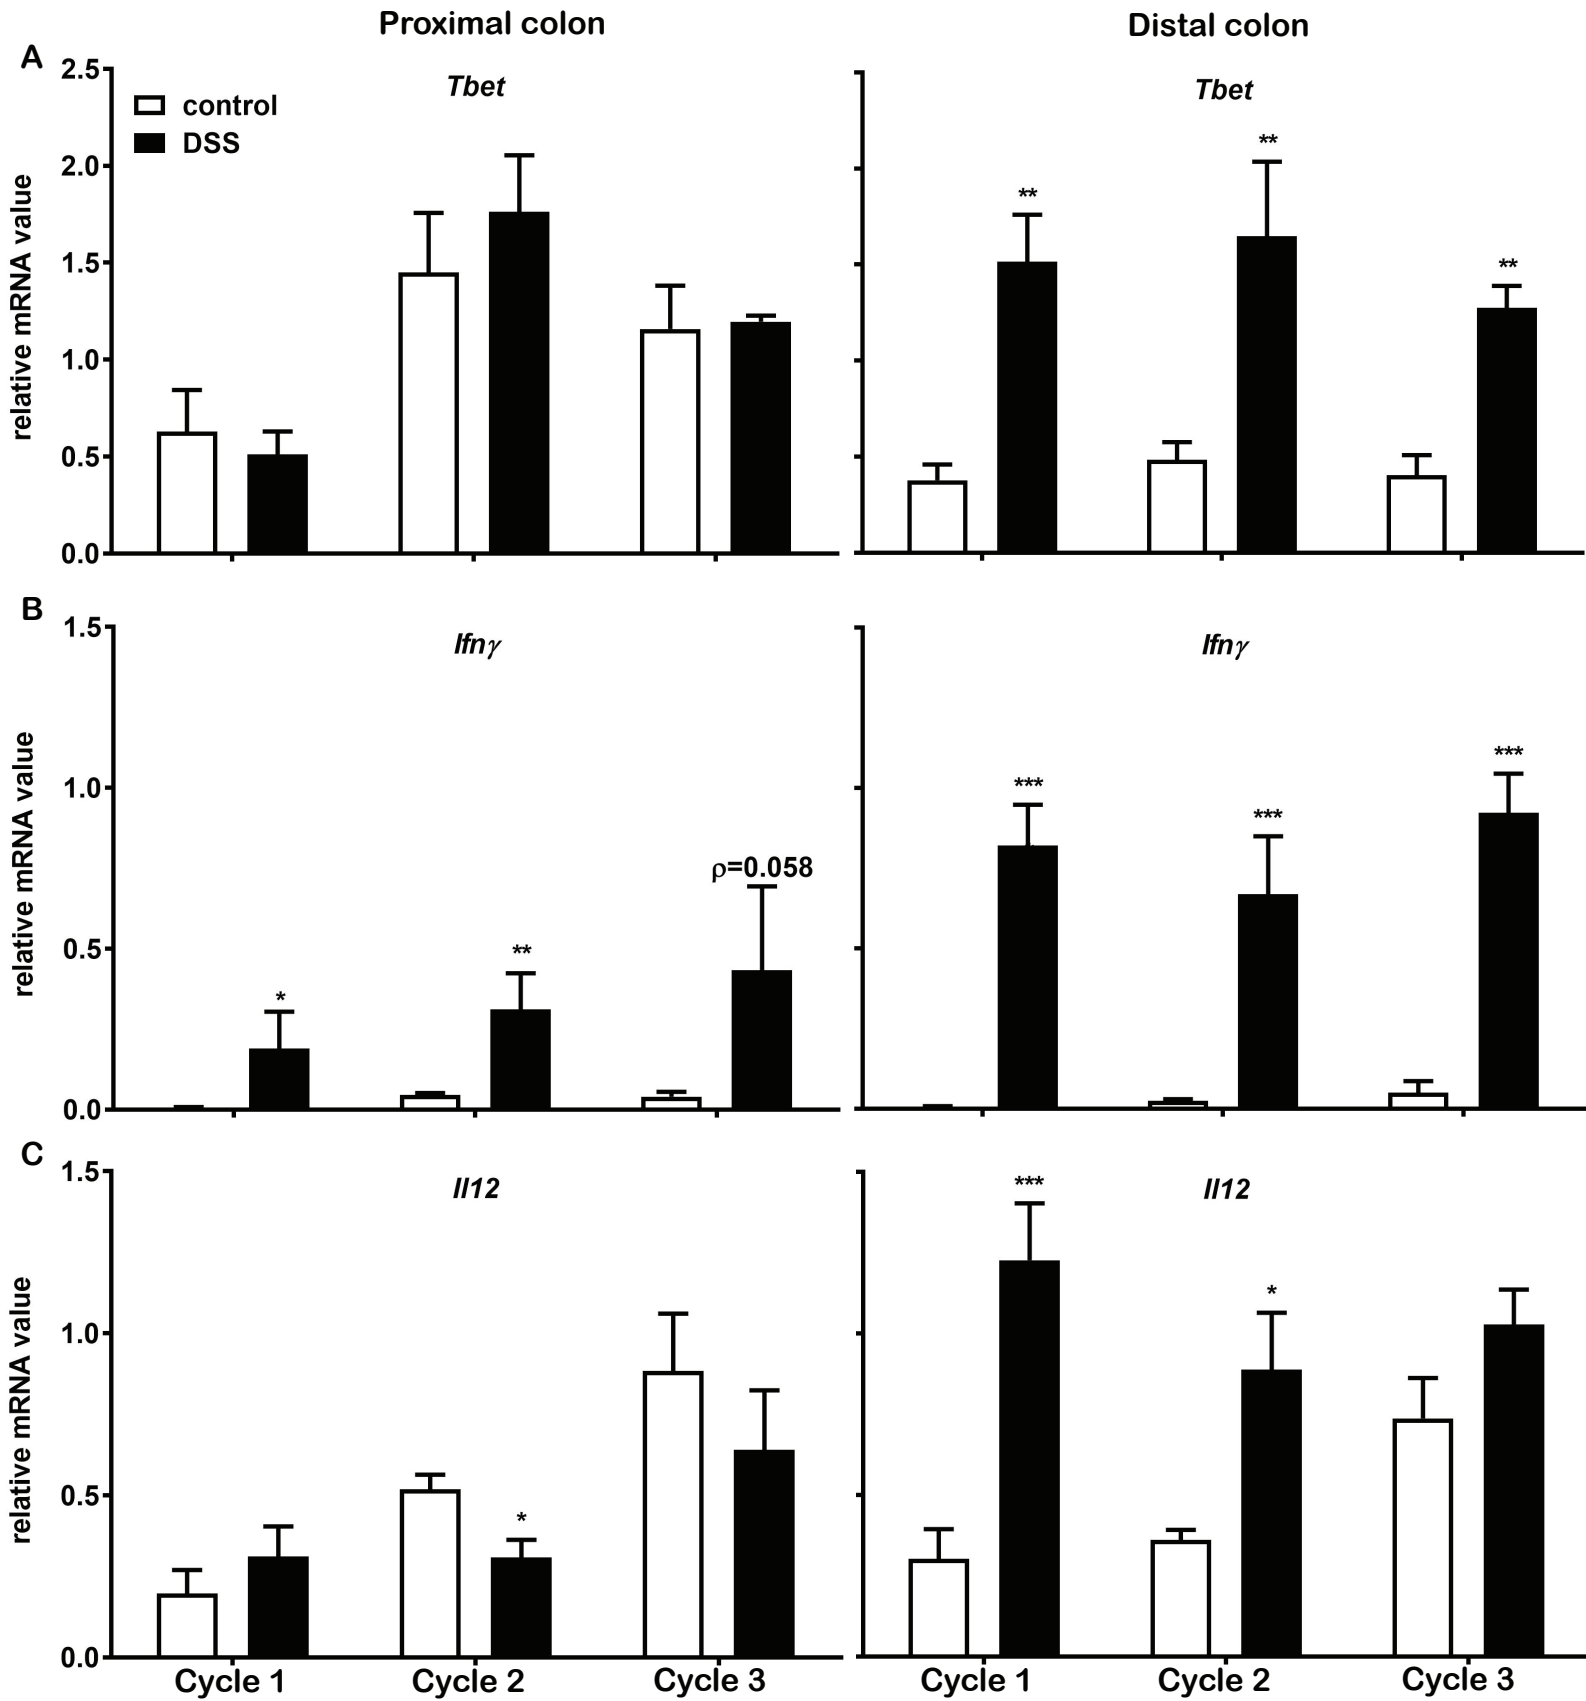

Supplement: mmc2.pdf [file mmc2.pdf]

Figure S3

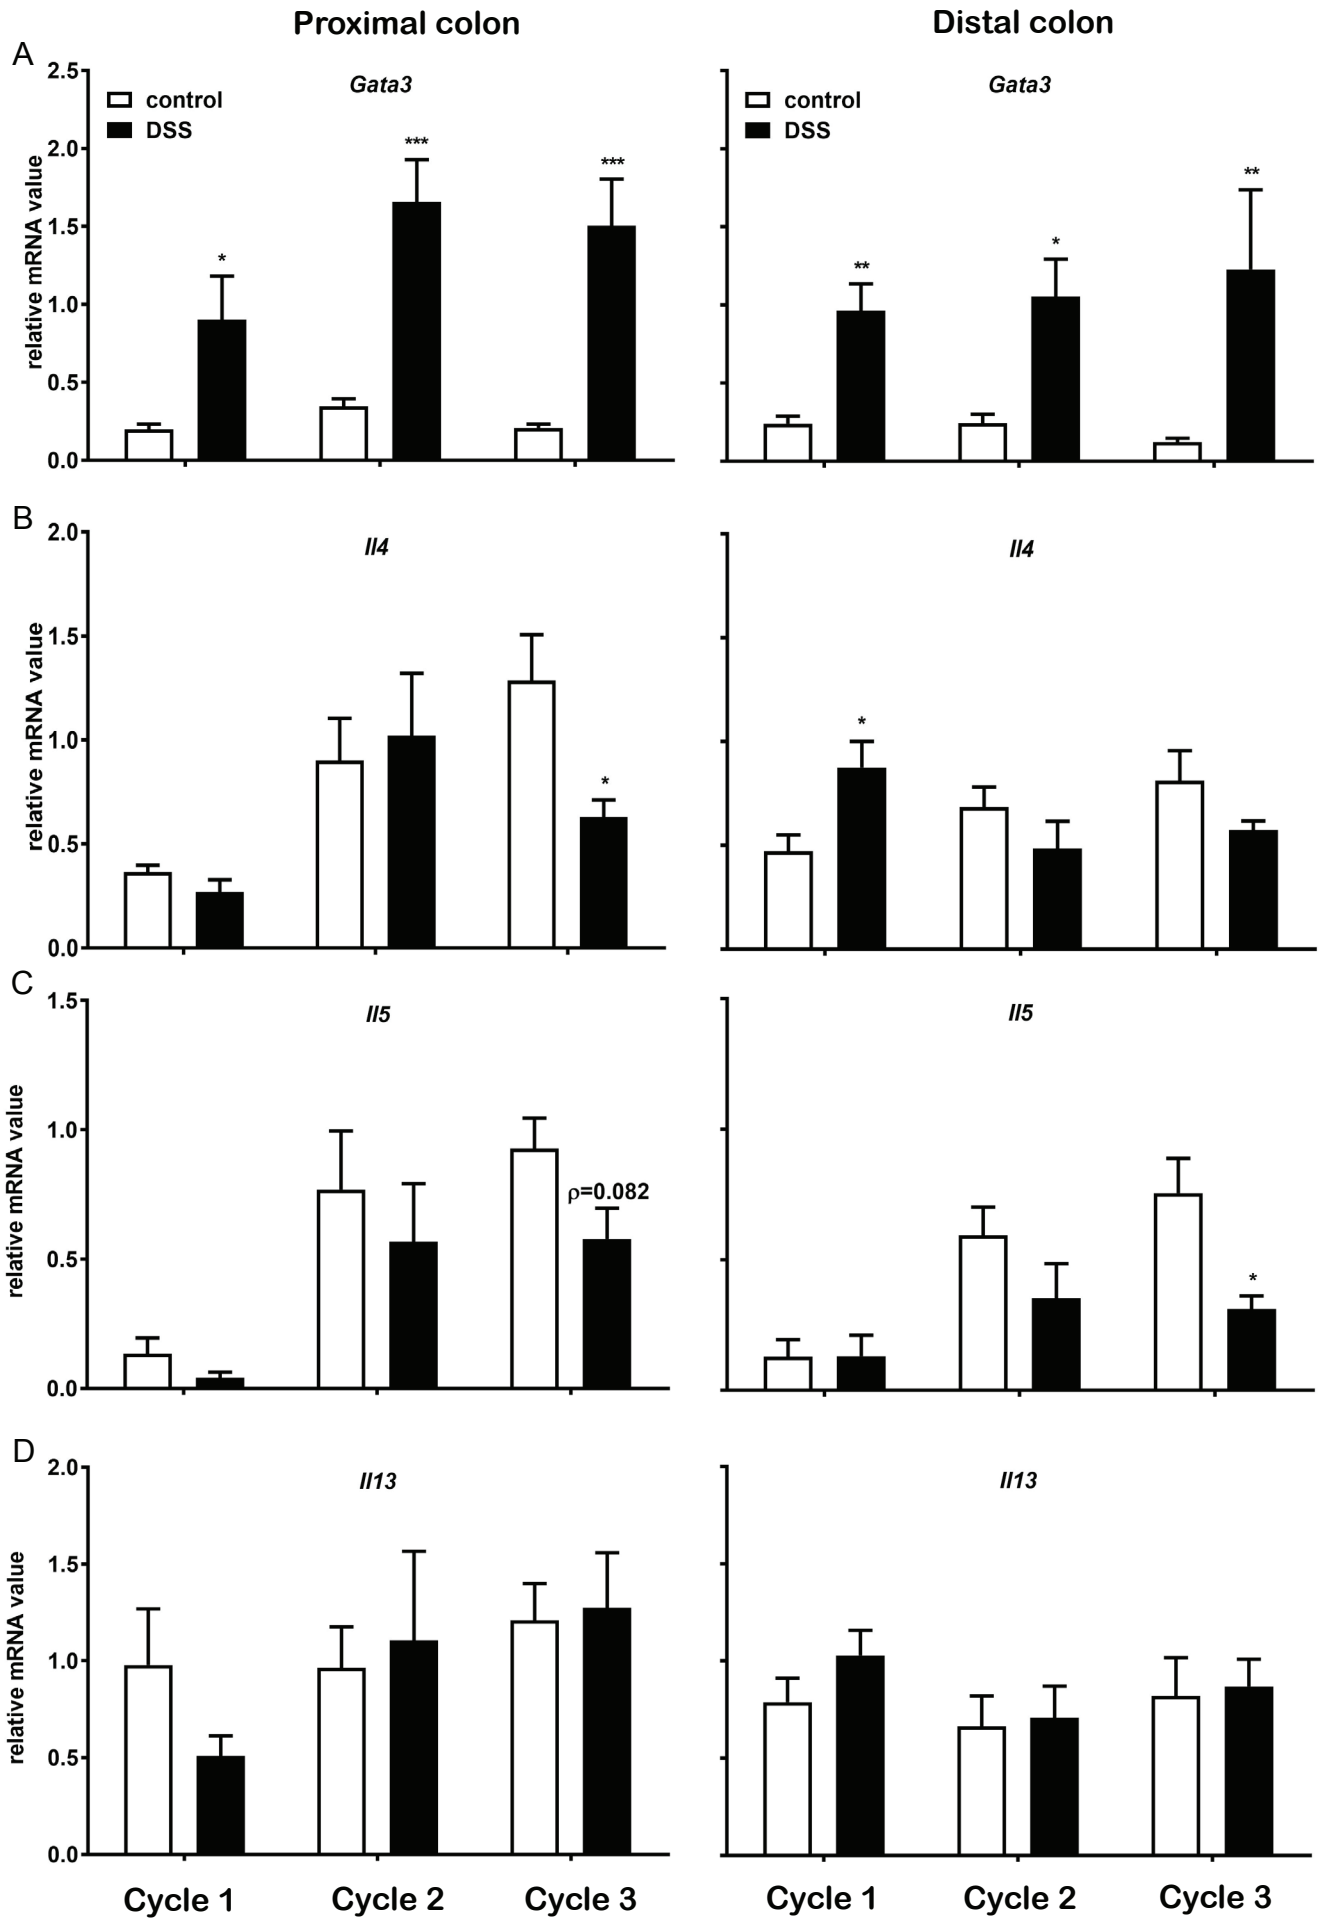

Supplement: mmc3.pdf [file mmc3.pdf]

Figure S4

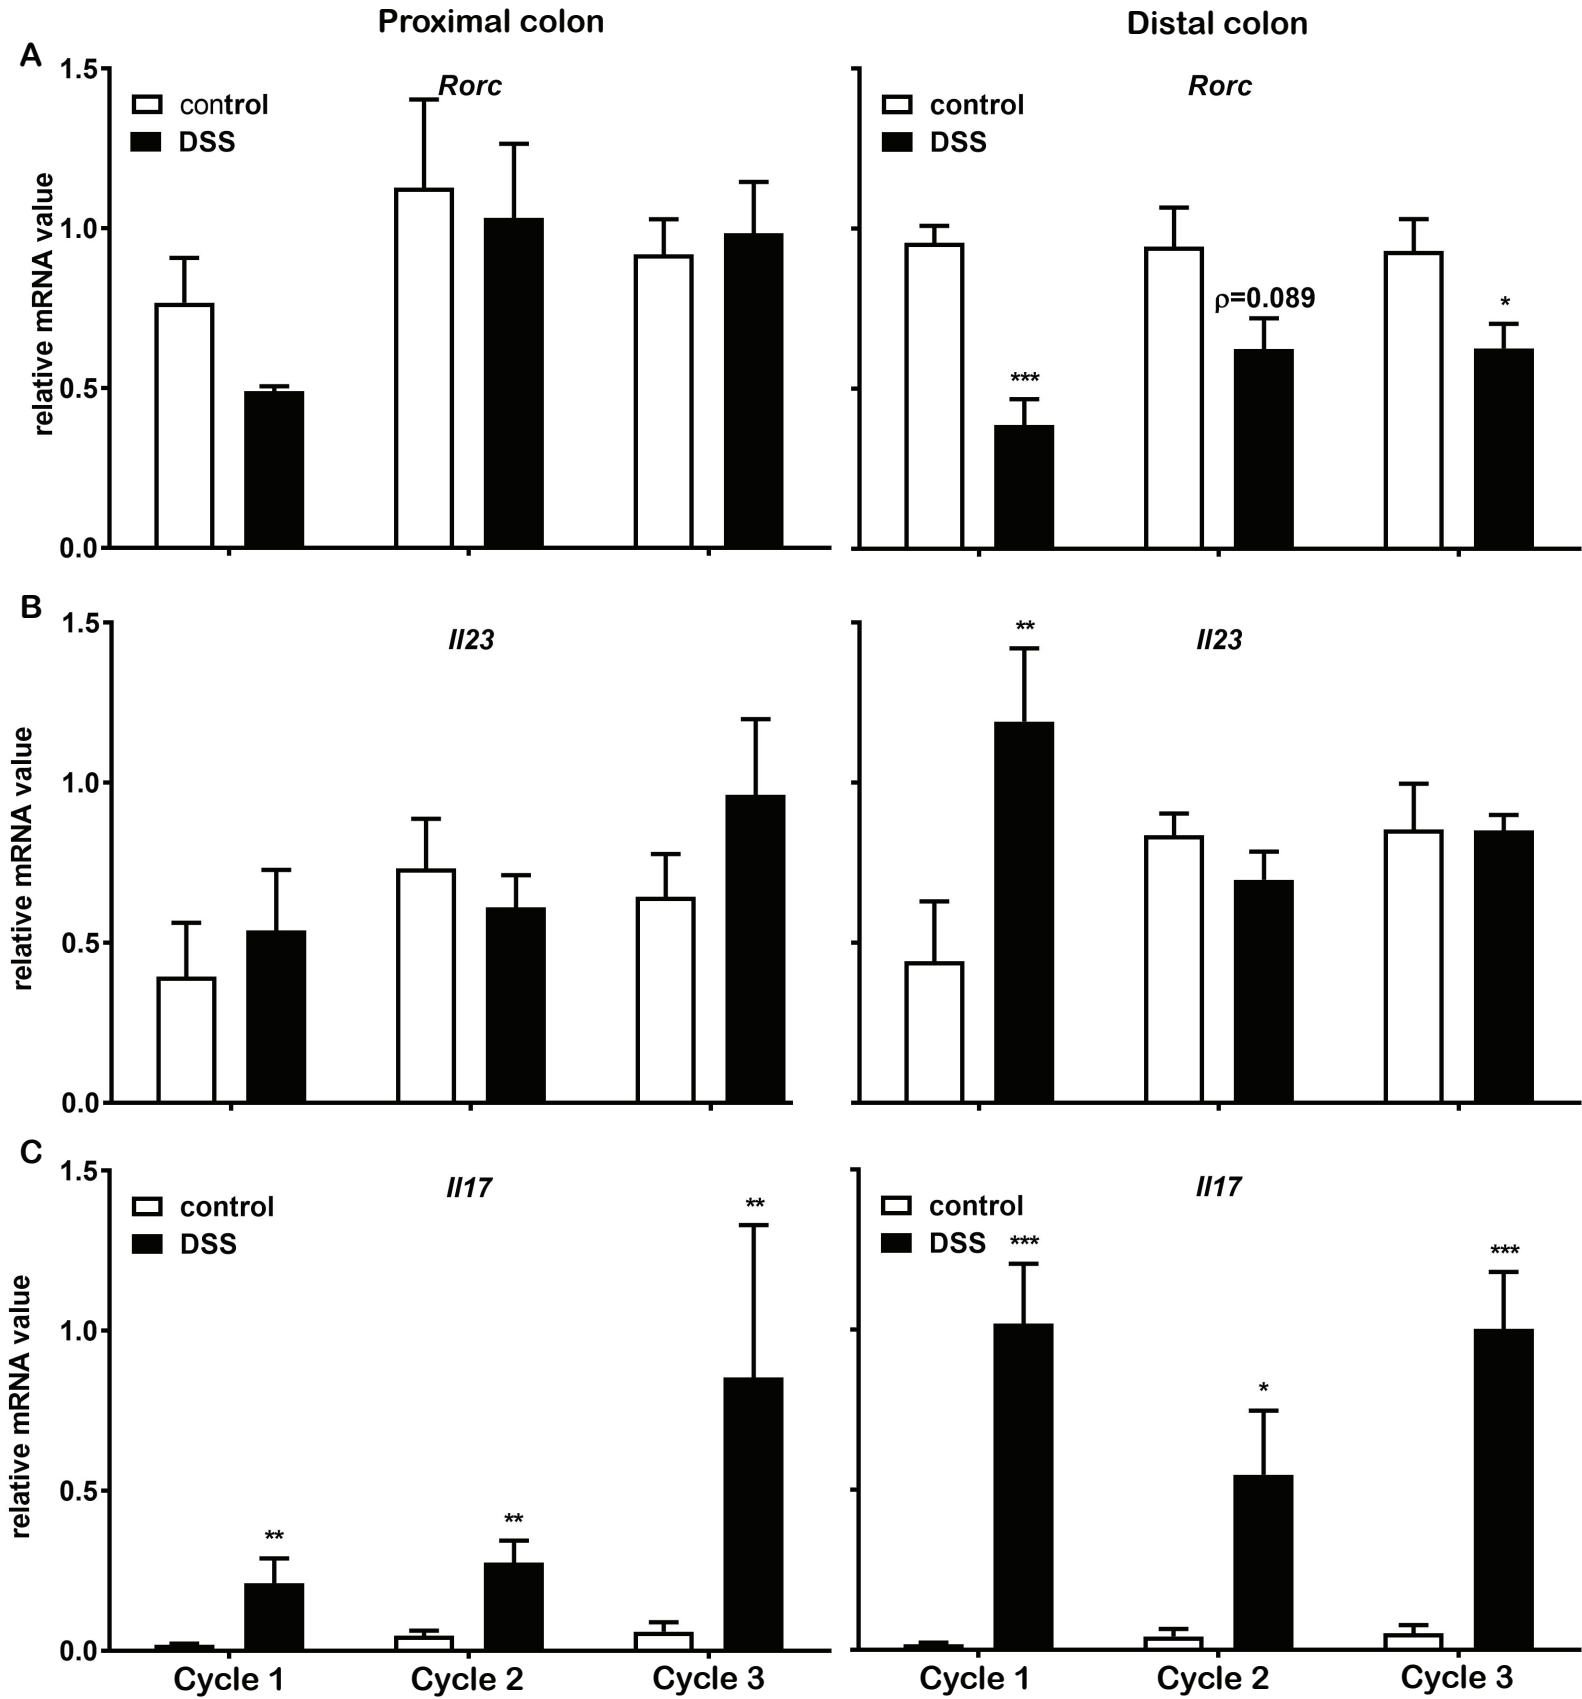

Supplement: mmc4.pdf [file mmc4.pdf]

Figure S5

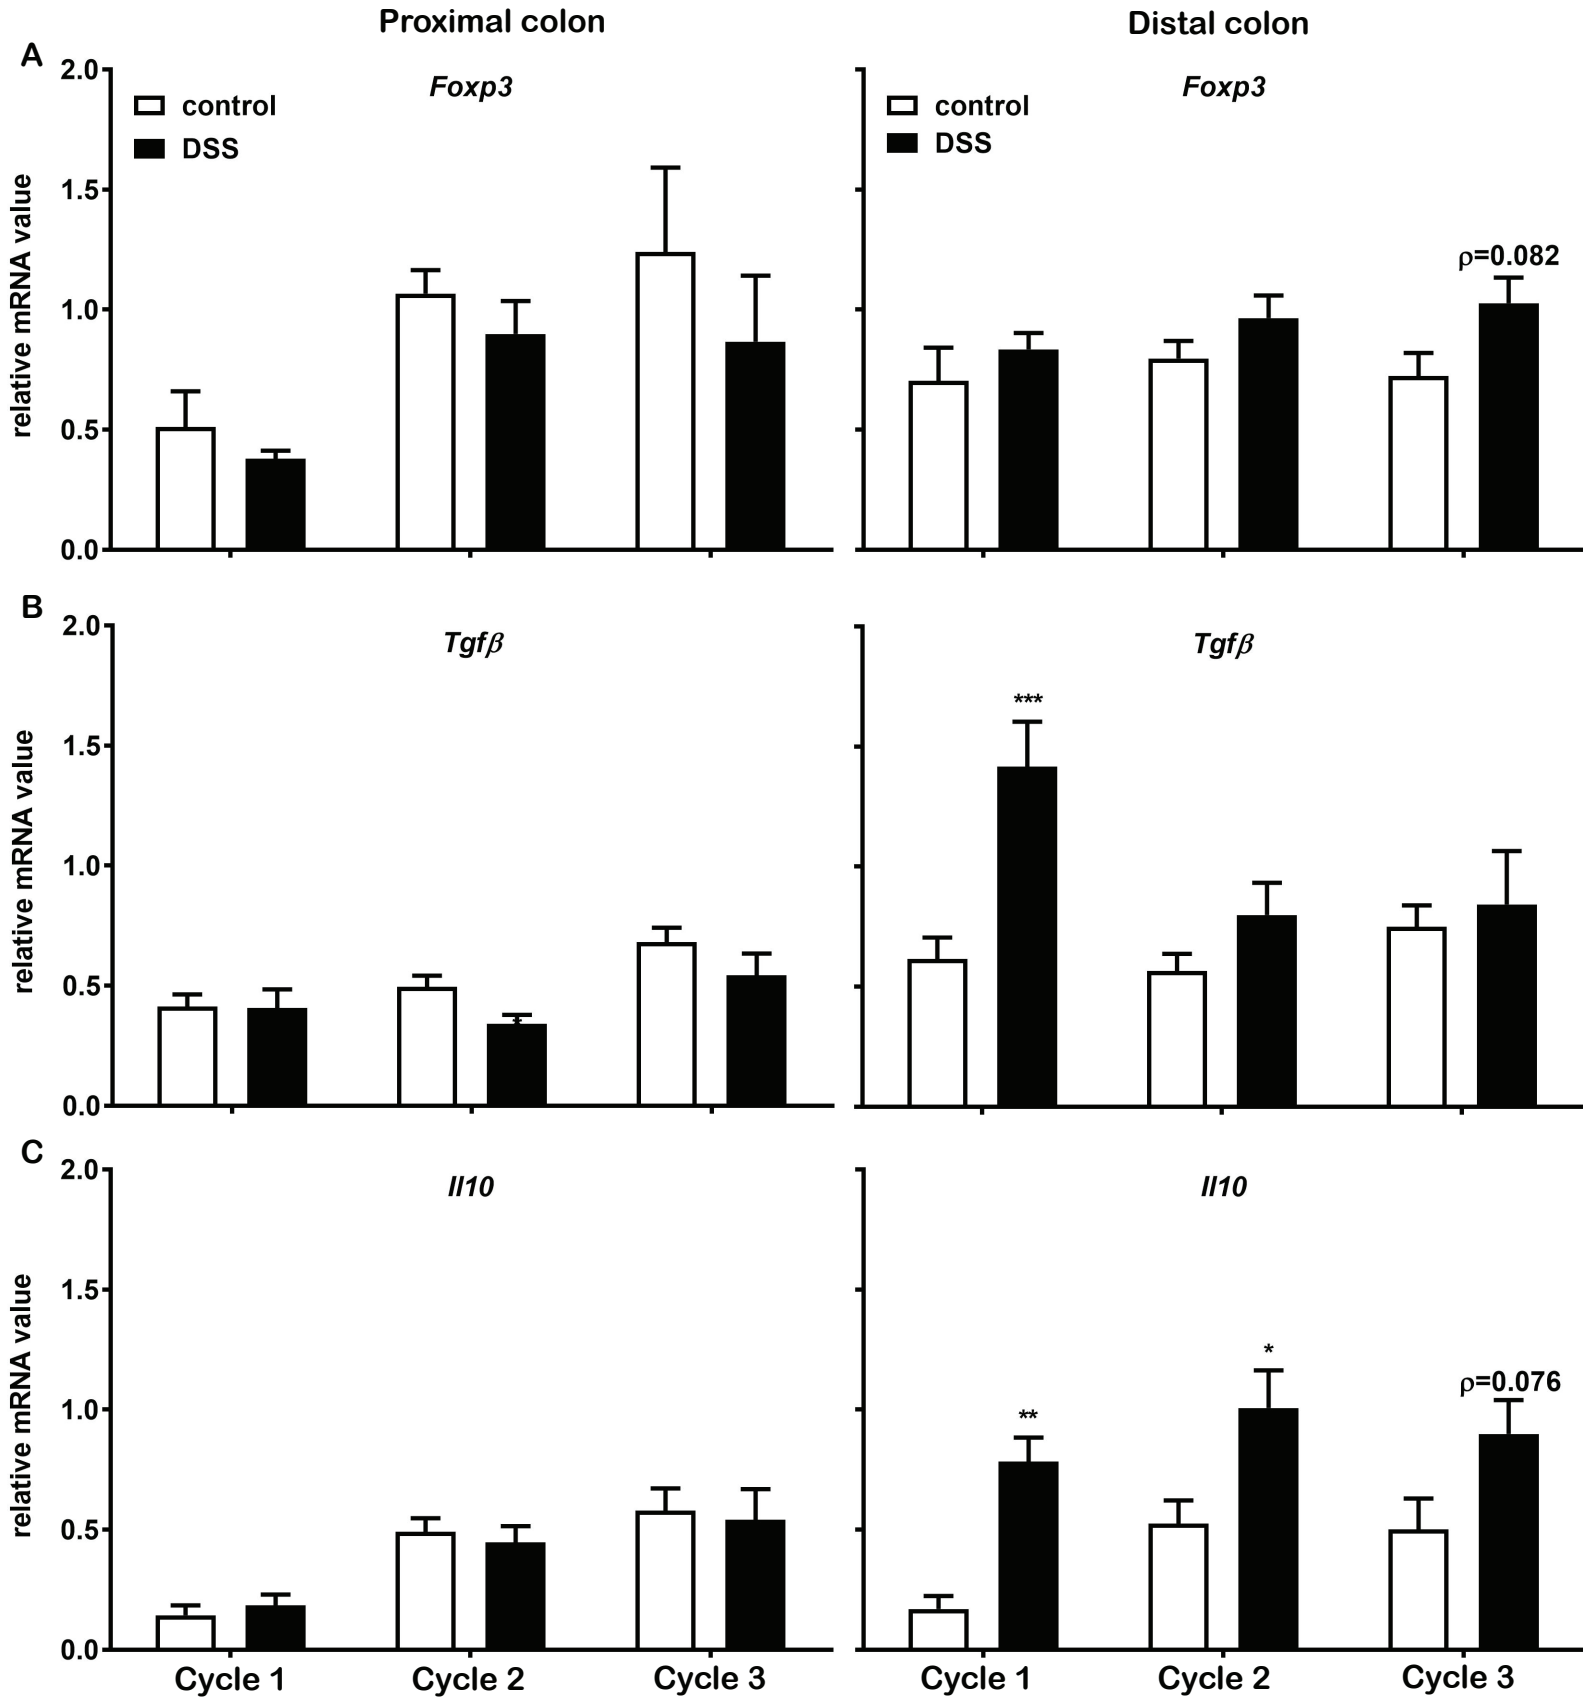

Supplement: mmc5.pdf [file mmc5.pdf]

Figure S6

A negative control of Ly-6B.2 staining

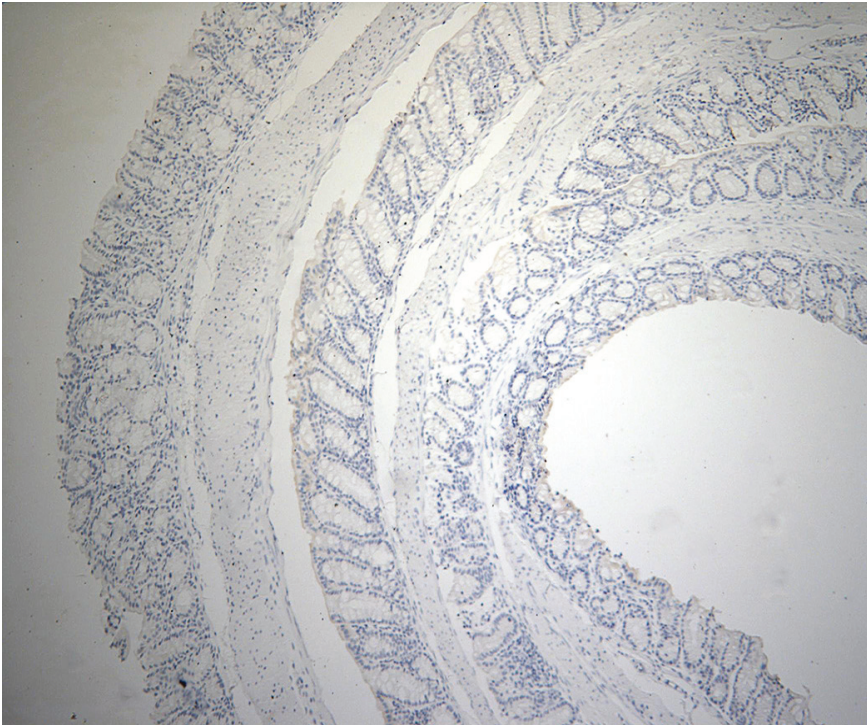

B negative control of Foxp3 staining

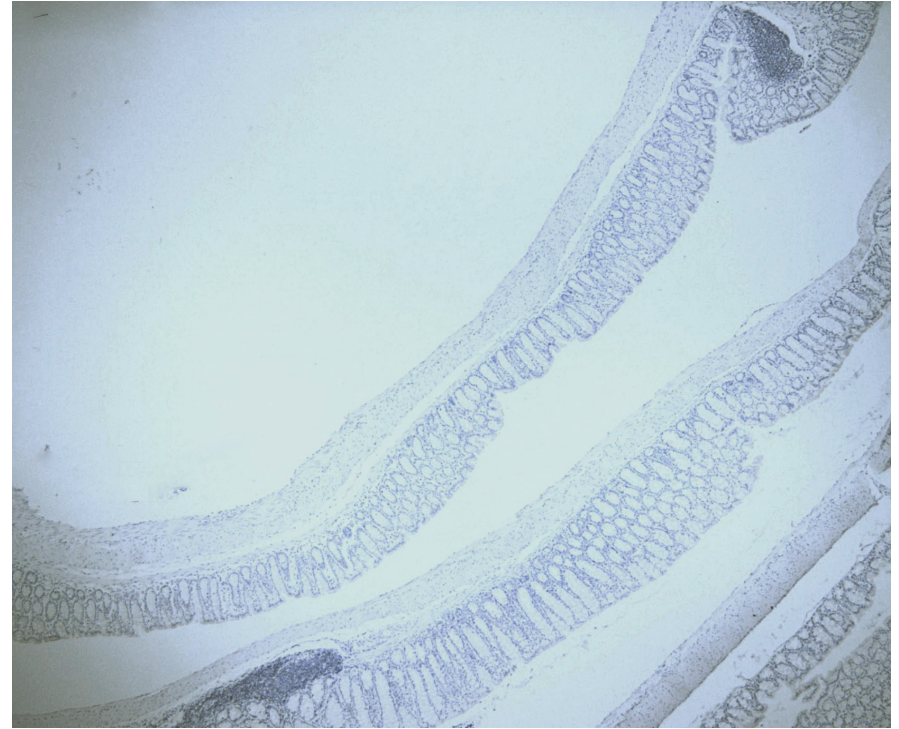

Supplement: mmc6.pdf [file mmc6.pdf]
